# Supplementary material
Source: publisher figshare collection journal article supplement (https://tandf.figshare.com/articles/dataset/_/3080893)
Supplement: Supplementary file 1 [file 1]

## Experimental materials in Experiment 1

Argument role reversal (Items 1-60) and Argument substitution (Items 61-120); (a) high cloze condition and (b) low cloze condition.

### Argument role reversal

- 1a. The aquarium visitor wondered which fish the penguins had eaten during the performance.
- 1b. The aquarium visitor wondered which trainer the penguins had eaten during the performance.
- 2a. The storyteller explained which dragon the prince had slain with his sword.
- 2b. The storyteller explained which princess the prince had slain with his sword.
- 3a. The superintendent overheard which tenant the landlord had evicted at the end of May.
- 3b. The superintendent overheard which realtor the landlord had evicted at the end of May.
- 4a. The butler speculated which guests the master had invited to the party.
- 4b. The butler speculated which servants the master had invited to the party.
- 5a. The priest mentioned which nonbeliever the nun had converted on her mission trip.
- 5b. The priest mentioned which archbishop the nun had converted on her mission trip.
- 6a. The sheriff boasted which horse the cowboy had ridden across the town.
- 6b. The sheriff boasted which bandit the cowboy had ridden across the town.
- 7a. Mr. Stevens revealed which clerk the manager had fired for being lazy.
- 7b. Mr. Stevens revealed which customer the manager had fired for being lazy.
- 8a. The secret serviceman concealed which ex-president the agent had protected from the terrorists.
- 8b. The secret serviceman concealed which assassin the agent had protected from the terrorists.
- 9a. The Roman emperor asked which god the gladiator had worshipped for strength in battle.
- 9b. The Roman emperor asked which adversary the gladiator had worshipped for strength in battle.
- 10a. The author revealed which maiden the hero had saved from the tower.
- 10b. The author revealed which ogre the hero had saved from the tower.
- 11a. The columnist publicized which billionaire the supermodel had married on public television.
- 11b. The columnist publicized which stylist the supermodel had married on public television.
- 12a. The Iranian scholar researched which camels the Persians had ridden across the desert.
- 12b. The Iranian scholar researched which soldiers the Persians had ridden across the desert.
- 13a. The beggar saw which leper the saint had cured in the street.
- 13b. The beggar saw which prophet the saint had cured in the street.
- 14a. The historian recorded which patriot the king had knighted at the ceremony.
- 14b. The historian recorded which traitor the king had knighted at the ceremony.
- 15a. The monk recalled which sinner the priest had forgiven in church yesterday.
- 15b. The monk recalled which cardinal the priest had forgiven in church yesterday.
- 16a. The scientist noted which antelope the lion had eaten for his dinner.
- 16b. The scientist noted which cub the lion had eaten for his dinner.
- 17a. The secretary confirmed which illustrator the author had hired for the new book.
- 17b. The secretary confirmed which readers the author had hired for the new book.
- 18a. The stenographer recorded which defendant the judge had sentenced to fifteen years.
- 18b. The stenographer recorded which lawyer the judge had sentenced to fifteen years.
- 19a. Spencer guessed which agent the actress had hired to promote her career.
- 19b. Spencer guessed which admirer the actress had hired to promote her career.
- 20a. The editor listed which orphans the philanthropist had adopted from the faraway place.
- 20b. The editor listed which volunteers the philanthropist had adopted from the faraway place.
- 21a. The farmer remembered which pig the butcher had slaughtered in his kitchen.
- 21b. The farmer remembered which vegetarian the butcher had slaughtered in his kitchen.
- 22a. The homeowner asked which insects the exterminator had killed when he came over.
- 22b. The homeowner asked which plumber the exterminator had killed when he came over.
- 23a. The barkeeper knew which barmaids the regulars had tipped for their drinks.
- 23b. The barkeeper knew which troublemakers the regulars had tipped for their drinks.
- 24a. The ethnographer asked which deer the Indians had hunted with bows and arrows.
- 24b. The ethnographer asked which babies the Indians had hunted with bows and arrows.
- 25a. The historian knew which princess the king had married at the royal palace.
- 25b. The historian knew which prince the king had married at the royal palace.
- 26a. The journalist reported which opponent the politician had defeated by a wide margin.
- 26b. The journalist reported which voters the politician had defeated by a wide margin.
- 27a. The parent noticed which insects the child had collected in a jar.
- 27b. The parent noticed which teacher the child had collected in a jar.
- 28a. The scribe recorded which loyalists the monarch had rewarded for their actions.

28b. The scribe recorded which rebels the monarch had rewarded for their actions.  
29a. The teacher remembered which delinquent the principal had suspended for a week.  
29b. The teacher remembered which overachiever the principal had suspended for a week.  
30a. Sally heard which patient the doctor had treated first thing this morning.  
30b. Sally heard which nurse the doctor had treated first thing this morning.  
31a. The beach bum saw which fish the seagulls had caught along the beach.  
31b. The beach bum saw which picnickers the seagulls had caught along the beach.  
32a. The circus-goer explained which juggler the clown had tripped in the center ring.  
32b. The circus-goer explained which child the clown had tripped in the center ring.  
33a. The football fan heard which cheerleader the quarterback had dated after the season.  
33b. The football fan heard which linebacker the quarterback had dated after the season.  
34a. The seasonal laborer marked which cows the farmer had milked early this morning.  
34b. The seasonal laborer marked which chickens the farmer had milked early this morning.  
35a. The secretary knew which manager the CEO had promoted from the old office.  
35b. The secretary knew which investor the CEO had promoted from the old office.  
36a. General Jones heard which terrorist the corporal had captured during the battle.  
36b. General Jones heard which comrade the corporal had captured during the battle.  
37a. Jason saw which nerd the teacher had praised for his good behavior.  
37b. Jason saw which rascal the teacher had praised for his good behavior.  
38a. Jim forgot which addict the therapist had treated in his last session.  
38b. Jim forgot which doctor the therapist had treated in his last session.  
39a. The announcer stated which teammate the player had replaced for the upcoming game.  
39b. The announcer stated which rival the player had replaced for the upcoming game.  
40a. The crafts fair manager asked which cows the leatherworker had skinned to make his bags.  
40b. The crafts fair manager asked which customers the leatherworker had skinned to make his bags.  
41a. The police woman recognized which officer the lieutenant had promoted to a higher position.  
41b. The police woman recognized which thief the lieutenant had promoted to a higher position.  
42a. The reviewer forgot which researchers the authors had cited in their paper.  
42b. The reviewer forgot which mice the authors had cited in their paper.  
43a. The swim team captain recalled which champion the swimmer had defeated at last week's race.  
43b. The swim team captain recalled which lifeguard the swimmer had defeated at last week's race.  
44a. The zoologist marked which pup the seal had birthed over the weekend.  
44b. The zoologist marked which walrus the seal had birthed over the weekend.  
45a. The captain realized which stowaway the sailor had hidden in the cargo hold.  
45b. The captain realized which pirate the sailor had hidden in the cargo hold.  
46a. The father recalled which girl the boy had dated in junior high.  
46b. The father recalled which dog the boy had dated in junior high.  
47a. The Japanese scientists showed which salespeople the robots had replaced in the last decade.  
47b. The Japanese scientists showed which patients the robots had replaced in the last decade.  
48a. The principal forgot which student the teacher had disciplined after school yesterday.  
48b. The principal forgot which parent the teacher had disciplined after school yesterday.  
49a. The shepherd saw which lamb the sheep had birthed by the barn.  
49b. The shepherd saw which predator the sheep had birthed by the barn.  
50a. The snoop determined which bouncer the alcoholic had punched last Friday night.  
50b. The snoop determined which psychologist the alcoholic had punched last Friday night.  
51a. Carla inquired which exterminator the landlord had used in the apartment.  
51b. Carla inquired which neighbor the landlord had used in the apartment.  
52a. Karen learned which teenager the mother had grounded for disobeying her.  
52b. Karen learned which baby the mother had grounded for disobeying her.  
53a. Sandra observed which biologists the zookeeper had consulted about the food.  
53b. Sandra observed which gorillas the zookeeper had consulted about the food.  
54a. The anthropologist discovered which animal the caveman had hunted with flint arrows.  
54b. The anthropologist discovered which goddess the caveman had hunted with flint arrows.  
55a. The mother wondered which trick-or-treaters the neighbor had scared with his costume.  
55b. The mother wondered which milkman the neighbor had scared with his costume.  
56a. The movie buff speculated which actor the stuntman had portrayed in the opening scene.  
56b. The movie buff speculated which director the stuntman had portrayed in the opening scene.  
57a. The researcher recorded which chimpanzee the biologist had tagged to be studied.  
57b. The researcher recorded which assistant the biologist had tagged to be studied.  
58a. The sentry knew which guard the captain had fired from the position.  
58b. The sentry knew which townspeople the captain had fired from the position.  
59a. The team manager knew which athlete the officials had penalized for being unsportsmanlike.

- 59b. The team manager knew which umpire the officials had penalized for being unsportsmanlike.
- 60a. The theater owner described which spectators the magician had amazed with his tricks.
- 60b. The theater owner described which rabbit the magician had amazed with his tricks.

#### Argument substitution

- 61a. The librarian documented which celebrities the journalist had interviewed for the magazine.
- 61b. The librarian documented which journalist the celebrities had interviewed for the magazine.
- 62a. The old widower remembered which villager the ghost had haunted for many years.
- 62b. The old widower remembered which ghost the villager had haunted for many years.
- 63a. The firefighter reported which victim the paramedic had saved after the fire.
- 63b. The firefighter reported which paramedic the victim had saved after the fire.
- 64a. The historian documented which prince the assassin had killed in the 10th century.
- 64b. The historian documented which assassin the prince had killed in the 10th century.
- 65a. The park ranger documented which eagle the hunter had shot with a rifle.
- 65b. The park ranger documented which hunter the eagle had shot with a rifle.
- 66a. The judo master recognized which defender the assailant had attacked late last night.
- 66b. The judo master recognized which assailant the defender had attacked late last night.
- 67a. The naturalist observed which predators the deer had avoided by sleeping in the daytime.
- 67b. The naturalist observed which deer the predators had avoided by sleeping in the daytime.
- 68a. The restaurant owner forgot which customer the waitress had served during dinner yesterday.
- 68b. The restaurant owner forgot which waitress the customer had served during dinner yesterday.
- 69a. The head nun explained which friar the temptress had seduced after Sunday mass.
- 69b. The head nun explained which temptress the friar had seduced after Sunday mass.
- 70a. The housekeeper showed which mouse the cat had killed under the table.
- 70b. The housekeeper showed which cat the mouse had killed under the table.
- 71a. The nanny knew which housekeeper the billionaire had hired from their conversation.
- 71b. The nanny knew which billionaire the housekeeper had hired from their conversation.
- 72a. The researcher learned which whale the biologist had studied in the lab.
- 72b. The researcher learned which biologist the whale had studied in the lab.
- 73a. Tracy announced which applicant the administrator had chosen after the interview.
- 73b. Tracy announced which administrator the applicant had chosen after the interview.
- 74a. The birthday boy saw which friend the clown had scared at the party.
- 74b. The birthday boy saw which clown the friend had scared at the party.
- 75a. The columnist publicized which photographer the celebrity had punched in the nose.
- 75b. The columnist publicized which celebrity the photographer had punched in the nose.
- 76a. The documentarian showed which piglets the agriculturalist had raised at the farm.
- 76b. The documentarian showed which agriculturalist the piglets had raised at the farm.
- 77a. The police officer noted which jeweler the burglar had robbed on his spree.
- 77b. The police officer noted which burglar the jeweler had robbed on his spree.
- 78a. The royal cook asked which lord the chef had served for twenty years.
- 78b. The royal cook asked which chef the lord had served for twenty years.
- 79a. The trapeze artist indicated which lion the trainer had tamed for the circus.
- 79b. The trapeze artist indicated which trainer the lion had tamed for the circus.
- 80a. The wildlife curator mentioned which ape the zookeeper had fed some fresh fruit.
- 80b. The wildlife curator mentioned which zookeeper the ape had fed some fresh fruit.
- 81a. The aid worker realized which refugees the philanthropist had helped to escape starvation.
- 81b. The aid worker realized which philanthropist the refugees had helped to escape starvation.
- 82a. The camper reported which girl the bear had mauled in the forest.
- 82b. The camper reported which bear the girl had mauled in the forest.
- 83a. The dance instructor noticed which onlookers the performers had impressed in the audience.
- 83b. The dance instructor noticed which performers the onlookers had impressed in the audience.
- 84a. The high schooler heard which geek the jock had bullied in the hall.
- 84b. The high schooler heard which jock the geek had bullied in the hall.
- 85a. The parent saw which child the lifeguard had rescued from the pool.
- 85b. The parent saw which lifeguard the child had rescued from the pool.
- 86a. The ringmaster recognized which cheetah the tamer had trained three years ago.
- 86b. The ringmaster recognized which tamer the cheetah had trained three years ago.
- 87a. The travel agent recorded which innkeeper the guests had liked in his notebook.
- 87b. The travel agent recorded which guests the innkeeper had liked in his notebook.
- 88a. The bird watcher saw which photographer the hawk had attacked in the woods.
- 88b. The bird watcher saw which hawk the photographer had attacked in the woods.
- 89a. The costume designer confirmed which actor the barber had shaved for the part.

89b. The costume designer confirmed which barber the actor had shaved for the part.

90a. The Indian king identified which prince the elephant had trampled during the long journey.

90b. The Indian king identified which elephant the prince had trampled during the long journey.

91a. The investigator discovered which couple the abductor had taken during their vacation.

91b. The investigator discovered which abductor the couple had taken during their vacation.

92a. The jail keeper forgot which guard the prisoner had attacked in his cell.

92b. The jail keeper forgot which prisoner the guard had attacked in his cell.

93a. The sailor saw which whale the man had harpooned on the starboard side.

93b. The sailor saw which man the whale had harpooned on the starboard side.

94a. The sheriff recalled which locals the gangsters had robbed in a dark alleyway.

94b. The sheriff recalled which gangsters the locals had robbed in a dark alleyway.

95a. The undead king recognized which woman the zombie had bitten during the fight.

95b. The undead king recognized which zombie the woman had bitten during the fight.

96a. Tonia explained which housewife the conman had swindled over the phone.

96b. Tonia explained which conman the housewife had swindled over the phone.

97a. The broadcaster explained which contestant the judge had disqualified from the show.

97b. The broadcaster explained which judge the contestant had disqualified from the show.

98a. The campaign volunteer speculated which mayor the voters had elected by a landslide.

98b. The campaign volunteer speculated which voters the mayor had elected by a landslide.

99a. The family counselor understood which daughter the stepparent had abused on a daily basis.

99b. The family counselor understood which stepparent the daughter had abused on a daily basis.

100a. The newscaster confirmed which fugitive the policeman had arrested following the robbery.

100b. The newscaster confirmed which policeman the fugitive had arrested following the robbery.

101a. The opera composer revealed which pirate the singer had portrayed with the greatest finesse.

101b. The opera composer revealed which singer the pirate had portrayed with the greatest finesse.

102a. The prison warden guessed which jailer the inmate had stabbed with a knife.

102b. The prison warden guessed which inmate the jailer had stabbed with a knife.

103a. The producer observed which viewers the acrobats had impressed with their tricks.

103b. The producer observed which acrobats the viewers had impressed with their tricks.

104a. The queen recognized which nobleman the comedian had entertained with his jokes.

104b. The queen recognized which comedian the nobleman had entertained with his jokes.

105a. The reporter inquired which animals the groomer had cleaned with special shampoo.

105b. The reporter inquired which groomer the animals had cleaned with special shampoo.

106a. The ape researcher identified which chimpanzee the poacher had shot in the jungle.

106b. The ape researcher identified which poacher the chimpanzee had shot in the jungle.

107a. The boatman saw which shark the diver had speared just off the shore.

107b. The boatman saw which diver the shark had speared just off the shore.

108a. The committee member guessed which advisors the president had appointed to the Cabinet.

108b. The committee member guessed which president the advisors had appointed to the Cabinet.

109a. The farmer indicated which donkey the townspeople had bought in the neighboring village.

109b. The farmer indicated which townspeople the donkey had bought in the neighboring village.

110a. The military man knew which soldiers the general had promoted after their tour.

110b. The military man knew which general the soldiers had promoted after their tour.

111a. The parole officer confirmed which delinquent the psychologist had treated several times already.

111b. The parole officer confirmed which psychologist the delinquent had treated several times already.

112a. The policeman knew which suspect the detective had arrested for the recent crime.

112b. The policeman knew which detective the suspect had arrested for the recent crime.

113a. The priest knew which demon the exorcist had expelled with a cross.

113b. The priest knew which exorcist the demon had expelled with a cross.

114a. Jack observed which passenger the conductor had removed from the train.

114b. Jack observed which conductor the passenger had removed from the train.

115a. Teresa knew which neighbor the parrot had bitten at the block party.

115b. Teresa knew which parrot the neighbor had bitten at the block party.

116a. The art critic identified which model the artist had drawn in the studio.

116b. The art critic identified which artist the model had drawn in the studio.

117a. The cotton farmer wondered which master the slave had escaped by running through the woods.

117b. The cotton farmer wondered which slave the master had escaped by running through the woods.

118a. The farmhand recorded which goats the breeder had sold at the market.

118b. The farmhand recorded which breeder the goats had sold at the market.

119a. The four-year-old knew which hero the dragon had eaten for dinner last night.

119b. The four-year-old knew which dragon the hero had eaten for dinner last night.

120a. The security guard investigated which patrolman the loiterer had evaded for three hours.

120b. The security guard investigated which loiterer the patrolman had evaded for three hours.

## Experimental materials in Experiment 2

(a) Different words, high cloze condition; (a) Different words, low cloze condition; (c) Same words, high cloze condition; (d) Same words, low cloze condition.

- 1a. The tenant inquired which neighbor the landlord had evicted from the apartment complex.
- 1b. The tenant inquired which exterminator the landlord had evicted from the apartment complex.
- 1c. The exterminator inquired which neighbor the landlord had evicted from the apartment complex.
- 1d. The neighbor inquired which exterminator the landlord had evicted from the apartment complex.
- 2a. The tenant inquired which exterminator the landlord had hired for the job.
- 2b. The tenant inquired which neighbor the landlord had hired for the job.
- 2c. The neighbor inquired which exterminator the landlord had hired for the job.
- 2d. The exterminator inquired which neighbor the landlord had hired for the job.
- 3a. The general heard which terrorist the corporal had captured during the stakeout.
- 3b. The general heard which comrade the corporal had captured during the stakeout.
- 3c. The comrade heard which terrorist the corporal had captured during the stakeout.
- 3d. The terrorist heard which comrade the corporal had captured during the stakeout.
- 4a. The general heard which comrade the corporal had promoted in the army.
- 4b. The general heard which terrorist the corporal had promoted in the army.
- 4c. The terrorist heard which comrade the corporal had promoted in the army.
- 4d. The comrade heard which terrorist the corporal had promoted in the army.
- 5a. The vice principal saw which rascal the teacher had punished with a detention note.
- 5b. The vice principal saw which nerd the teacher had punished with a detention note.
- 5c. The nerd saw which rascal the teacher had punished with a detention note.
- 5d. The rascal saw which nerd the teacher had punished with a detention note.
- 6a. The vice principal saw which nerd the teacher had praised in the classroom.
- 6b. The vice principal saw which rascal the teacher had praised in the classroom.
- 6c. The rascal saw which nerd the teacher had praised in the classroom.
- 6d. The nerd saw which rascal the teacher had praised in the classroom.
- 7a. The journalist wrote which foodie the chef had served at the restaurant.
- 7b. The journalist wrote which waiter the chef had served at the restaurant.
- 7c. The waiter wrote which foodie the chef had served at the restaurant.
- 7d. The foodie wrote which waiter the chef had served at the restaurant.
- 8a. The journalist wrote which waiter the chef had yelled at for being incompetent.
- 8b. The journalist wrote which foodie the chef had yelled at for being incompetent.
- 8c. The foodie wrote which waiter the chef had yelled at for being incompetent.
- 8d. The waiter wrote which foodie the chef had yelled at for being incompetent.
- 9a. The secretary forgot which addict the therapist had treated at the clinic.
- 9b. The secretary forgot which doctor the therapist had treated at the clinic.
- 9c. The doctor forgot which addict the therapist had treated at the clinic.
- 9d. The addict forgot which doctor the therapist had treated at the clinic.
- 10a. The secretary forgot which doctor the therapist had recommended for him to go to.
- 10b. The secretary forgot which addict the therapist had recommended for him to go to.
- 10c. The addict forgot which doctor the therapist had recommended for him to go to.
- 10d. The doctor forgot which addict the therapist had recommended for him to go to.
- 11a. The babysitter learned which baby the mother had adopted several weeks ago.
- 11b. The babysitter learned which teenager the mother had adopted several weeks ago.
- 11c. The teenager learned which baby the mother had adopted several weeks ago.
- 11d. The baby learned which teenager the mother had adopted several weeks ago.
- 12a. The babysitter learned which teenager the mother had punished for being late.
- 12b. The babysitter learned which baby the mother had punished for being late.
- 12c. The baby learned which teenager the mother had punished for being late.
- 12d. The teenager learned which baby the mother had punished for being late.
- 13a. The executive revealed which clerk the manager had promoted to a higher position.
- 13b. The executive revealed which customer the manager had promoted to a higher position.
- 13c. The customer revealed which clerk the manager had promoted to a higher position.
- 13d. The clerk revealed which customer the manager had promoted to a higher position.
- 14a. The administrator heard which patient the doctor had treated in the hospital room.
- 14b. The administrator heard which nurse the doctor had treated in the hospital room.

- 14c. The nurse heard which patient the doctor had treated in the hospital room.
- 14d. The patient heard which nurse the doctor had treated in the hospital room.
- 15a. The administrator heard which nurse the doctor had hired to assist him.
- 15b. The administrator heard which patient the doctor had hired to assist him.
- 15c. The patient heard which nurse the doctor had hired to assist him.
- 15d. The nurse heard which patient the doctor had hired to assist him.
- 16a. The author revealed which ogre the hero had slain in the cave.
- 16b. The author revealed which maiden the hero had slain in the cave.
- 16c. The maiden revealed which ogre the hero had slain in the cave.
- 16d. The ogre revealed which maiden the hero had slain in the cave.
- 17a. The author revealed which maiden the hero had rescued after the fight.
- 17b. The author revealed which ogre the hero had rescued after the fight.
- 17c. The ogre revealed which maiden the hero had rescued after the fight.
- 17d. The maiden revealed which ogre the hero had rescued after the fight.
- 18a. The bartender knew which troublemakers the regulars had fought after getting drunk.
- 18b. The bartender knew which barmaids the regulars had fought after getting drunk.
- 18c. The barmaids knew which troublemakers the regulars had fought after getting drunk.
- 18d. The troublemakers knew which barmaids the regulars had fought after getting drunk.
- 19a. The bartender knew which barmaids the regulars had tipped extra money to.
- 19b. The bartender knew which troublemakers the regulars had tipped extra money to.
- 19c. The troublemakers knew which barmaids the regulars had tipped extra money to.
- 19d. The barmaids knew which troublemakers the regulars had tipped extra money to.
- 20a. The businessman overheard which libelist the executive had sued at the court.
- 20b. The businessman overheard which clerk the executive had sued at the court.
- 20c. The clerk overheard which libelist the executive had sued at the court.
- 20d. The libelist overheard which clerk the executive had sued at the court.
- 21a. The businessman overheard which clerk the executive had promoted in the company.
- 21b. The businessman overheard which libelist the executive had promoted in the company.
- 21c. The libelist overheard which clerk the executive had promoted in the company.
- 21d. The clerk overheard which libelist the executive had promoted in the company.
- 22a. The butler speculated which guests the master had invited to his manor.
- 22b. The butler speculated which servants the master had invited to his manor.
- 22c. The servants speculated which guests the master had invited to his manor.
- 22d. The guests speculated which servants the master had invited to his manor.
- 23a. The butler speculated which servants the master had fired from the job.
- 23b. The butler speculated which guests the master had fired from the job.
- 23c. The guests speculated which servants the master had fired from the job.
- 23d. The servants speculated which guests the master had fired from the job.
- 24a. The comic book artist announced which sidekick the superhero had chosen as his partner.
- 24b. The comic book artist announced which villain the superhero had chosen as his partner.
- 24c. The villain announced which sidekick the superhero had chosen as his partner.
- 24d. The sidekick announced which villain the superhero had chosen as his partner.
- 25a. The department chair stated which cheater the professor had caught during the exam.
- 25b. The department chair stated which proctor the professor had caught during the exam.
- 25c. The proctor stated which cheater the professor had caught during the exam.
- 25d. The cheater stated which proctor the professor had caught during the exam.
- 26a. The department chair stated which proctor the professor had used for the final test.
- 26b. The department chair stated which cheater the professor had used for the final test.
- 26c. The cheater stated which proctor the professor had used for the final test.
- 26d. The proctor stated which cheater the professor had used for the final test.
- 27a. The deputy deduced which hooligan the gangster had recruited for the assignment.
- 27b. The deputy deduced which victim the gangster had recruited for the assignment.
- 27c. The victim deduced which hooligan the gangster had recruited for the assignment.
- 27d. The hooligan deduced which victim the gangster had recruited for the assignment.
- 28a. The deputy deduced which victim the gangster had robbed in the alleyway.
- 28b. The deputy deduced which hooligan the gangster had robbed in the alleyway.
- 28c. The hooligan deduced which victim the gangster had robbed in the alleyway.
- 28d. The victim deduced which hooligan the gangster had robbed in the alleyway.
- 29a. The fairy princess described which demons the sorceress had summoned with her spell.
- 29b. The fairy princess described which newts the sorceress had summoned with her spell.
- 29c. The newts described which demons the sorceress had summoned with her spell.
- 29d. The demons described which newts the sorceress had summoned with her spell.

- 30a. The fairy princess described which newts the sorceress had used in the potion.
- 30b. The fairy princess described which demons the sorceress had used in the potion.
- 30c. The demons described which newts the sorceress had used in the potion.
- 30d. The newts described which demons the sorceress had used in the potion.
- 31a. The journalist reported which opponent the politician had defeated in the election.
- 31b. The journalist reported which voters the politician had defeated in the election.
- 31c. The voters reported which opponent the politician had defeated in the election.
- 31d. The opponent reported which voters the politician had defeated in the election.
- 32a. The journalist reported which voters the politician had bribed with his money.
- 32b. The journalist reported which opponent the politician had bribed with his money.
- 32c. The opponent reported which voters the politician had bribed with his money.
- 32d. The voters reported which opponent the politician had bribed with his money.
- 33a. The paleoanthropologist discovered which goddess the caveman had worshipped with his murals.
- 33b. The paleoanthropologist discovered which animal the caveman had worshipped with his murals.
- 33c. The animal discovered which goddess the caveman had worshipped with his murals.
- 33d. The goddess discovered which animal the caveman had worshipped with his murals.
- 34a. The paleoanthropologist discovered which animal the caveman had eaten during the winter.
- 34b. The paleoanthropologist discovered which goddess the caveman had eaten during the winter.
- 34c. The goddess discovered which animal the caveman had eaten during the winter.
- 34d. The animal discovered which goddess the caveman had eaten during the winter.
- 35a. The reporter publicized which golddigger the millionaire had married the previous week.
- 35b. The reporter publicized which entrepreneur the millionaire had married the previous week.
- 35c. The entrepreneur publicized which golddigger the millionaire had married the previous week.
- 35d. The golddigger publicized which entrepreneur the millionaire had married the previous week.
- 36a. The reporter publicized which entrepreneur the millionaire had invested in for the fiscal year.
- 36b. The reporter publicized which golddigger the millionaire had invested in for the fiscal year.
- 36c. The golddigger publicized which entrepreneur the millionaire had invested in for the fiscal year.
- 36d. The entrepreneur publicized which golddigger the millionaire had invested in for the fiscal year.
- 37a. The secret serviceman concealed which assassin the agent had shot in the chest.
- 37b. The secret serviceman concealed which ex-president the agent had shot in the chest.
- 37c. The ex-president concealed which assassin the agent had shot in the chest.
- 37d. The assassin concealed which ex-president the agent had shot in the chest.
- 38a. The secret serviceman concealed which ex-president the agent had protected from the bullet.
- 38b. The secret serviceman concealed which assassin the agent had protected from the bullet.
- 38c. The assassin concealed which ex-president the agent had protected from the bullet.
- 38d. The ex-president concealed which assassin the agent had protected from the bullet.
- 39a. The storyteller explained which princess the prince had saved with his bravery.
- 39b. The storyteller explained which dragon the prince had saved with his bravery.
- 39c. The dragon explained which princess the prince had saved with his bravery.
- 39d. The princess explained which dragon the prince had saved with his bravery.
- 40a. The storyteller explained which dragon the prince had slain with his sword.
- 40b. The storyteller explained which princess the prince had slain with his sword.
- 40c. The princess explained which dragon the prince had slain with his sword.
- 40d. The dragon explained which princess the prince had slain with his sword.
- 41a. The swim team recalled which champion the swimmer had beaten during the race.
- 41b. The swim team recalled which lifeguard the swimmer had beaten during the race.
- 41c. The lifeguard recalled which champion the swimmer had beaten during the race.
- 41d. The champion recalled which lifeguard the swimmer had beaten during the race.
- 42a. The swim team recalled which lifeguard the swimmer had saved by giving CPR.
- 42b. The swim team recalled which champion the swimmer had saved by giving CPR.
- 42c. The champion recalled which lifeguard the swimmer had saved by giving CPR.
- 42d. The lifeguard recalled which champion the swimmer had saved by giving CPR.
- 43a. The teacher remembered which delinquent the principal had punished after the scuffle.
- 43b. The teacher remembered which overachiever the principal had punished after the scuffle.
- 43c. The overachiever remembered which delinquent the principal had punished after the scuffle.
- 43d. The delinquent remembered which overachiever the principal had punished after the scuffle.
- 44a. The teacher remembered which overachiever the principal had praised for good grades.
- 44b. The teacher remembered which delinquent the principal had praised for good grades.
- 44c. The delinquent remembered which overachiever the principal had praised for good grades.
- 44d. The overachiever remembered which delinquent the principal had praised for good grades.
- 45a. The team manager knew which athlete the officials had penalized during the match.
- 45b. The team manager knew which umpire the officials had penalized during the match.

- 45c. The umpire knew which athlete the officials had penalized during the match.
- 45d. The athlete knew which umpire the officials had penalized during the match.
- 46a. The team manager knew which umpire the officials had selected to be at the game.
- 46b. The team manager knew which athlete the officials had selected to be at the game.
- 46c. The athlete knew which umpire the officials had selected to be at the game.
- 46d. The umpire knew which athlete the officials had selected to be at the game.
- 47a. The pharmacist realized which customer the physician had helped in the examination room.
- 47b. The pharmacist realized which specialist the physician had helped in the examination room.
- 47c. The specialist realized which customer the physician had helped in the examination room.
- 47d. The customer realized which specialist the physician had helped in the examination room.
- 48a. The pharmacist realized which customer the physician had recommended for further analysis.
- 48b. The pharmacist realized which customer the physician had recommended for further analysis.
- 48c. The customer realized which specialist the physician had recommended for further analysis.
- 48d. The specialist realized which customer the physician had recommended for further analysis.
- 49a. The woman understood which pharmacist the psychiatrist had recommended to take a visit to.
- 49b. The woman understood which addict the psychiatrist had recommended to take a visit to.
- 49c. The addict understood which pharmacist the psychiatrist had recommended to take a visit to.
- 49d. The pharmacist understood which addict the psychiatrist had recommended to take a visit to.
- 50a. The woman understood which addict the psychiatrist had treated for several months.
- 50b. The woman understood which pharmacist the psychiatrist had treated for several months.
- 50c. The pharmacist understood which addict the psychiatrist had treated for several months.
- 50d. The addict understood which pharmacist the psychiatrist had treated for several months.
- 51a. The reporter mentioned which believer the psychic had read the future for.
- 51b. The reporter mentioned which skeptic the psychic had read the future for.
- 51c. The skeptic mentioned which believer the psychic had read the future for.
- 51d. The believer mentioned which skeptic the psychic had read the future for.
- 52a. The reporter mentioned which believer the psychic had convinced with her act.
- 52b. The reporter mentioned which believer the psychic had convinced with her act.
- 52c. The believer mentioned which skeptic the psychic had convinced with her act.
- 52d. The skeptic mentioned which believer the psychic had convinced with her act.
- 53a. The editor knew which cameraman the anthropologist had used for the expedition.
- 53b. The editor knew which tribesman the anthropologist had used for the expedition.
- 53c. The tribesman knew which cameraman the anthropologist had used for the expedition.
- 53d. The cameraman knew which tribesman the anthropologist had used for the expedition.
- 54a. The editor knew which tribesman the anthropologist had studied for the last year.
- 54b. The editor knew which cameraman the anthropologist had studied for the last year.
- 54c. The cameraman knew which tribesman the anthropologist had studied for the last year.
- 54d. The tribesman knew which cameraman the anthropologist had studied for the last year.
- 55a. The intern heard which surgeon the dentist had recommended for a follow-up.
- 55b. The intern heard which patient the dentist had recommended for a follow-up.
- 55c. The patient heard which surgeon the dentist had recommended for a follow-up.
- 55d. The surgeon heard which patient the dentist had recommended for a follow-up.
- 56a. The intern heard which patient the dentist had injured during the check-up.
- 56b. The intern heard which surgeon the dentist had injured during the check-up.
- 56c. The surgeon heard which patient the dentist had injured during the check-up.
- 56d. The patient heard which surgeon the dentist had injured during the check-up.
- 57a. The king saw which damsel the superhero had saved from the fire.
- 57b. The king saw which villain the superhero had saved from the fire.
- 57c. The villain saw which damsel the superhero had saved from the fire.
- 57d. The damsel saw which villain the superhero had saved from the fire.
- 58a. The king saw which villain the superhero had defeated in the battle.
- 58b. The king saw which damsel the superhero had defeated in the battle.
- 58c. The damsel saw which villain the superhero had defeated in the battle.
- 58d. The villain saw which damsel the superhero had defeated in the battle.
- 59a. The principal observed which perfectionist the teacher had praised for good work.
- 59b. The principal observed which troublemaker the teacher had praised for good work.
- 59c. The troublemaker observed which perfectionist the teacher had praised for good work.
- 59d. The perfectionist observed which troublemaker the teacher had praised for good work.
- 60a. The principal observed which troublemaker the teacher had punished for starting a fight.
- 60b. The principal observed which perfectionist the teacher had punished for starting a fight.
- 60c. The perfectionist observed which troublemaker the teacher had punished for starting a fight.
- 60d. The troublemaker observed which perfectionist the teacher had punished for starting a fight.



- 61a. The regulars saw which patron the owner had served a beer to.
- 61b. The regulars saw which bartender the owner had served a beer to.
- 61c. The bartender saw which patron the owner had served a beer to.
- 61d. The patron saw which bartender the owner had served a beer to.
- 62a. The regulars saw which bartender the owner had fired from the position.
- 62b. The regulars saw which patron the owner had fired from the position.
- 62c. The patron saw which bartender the owner had fired from the position.
- 62d. The bartender saw which patron the owner had fired from the position.
- 63a. The bookie knew which jockey the horse had thrown during the tourney.
- 63b. The bookie knew which gambler the horse had thrown during the tourney.
- 63c. The gambler knew which jockey the horse had thrown during the tourney.
- 63d. The jockey knew which gambler the horse had thrown during the tourney.
- 64a. The school nurse knew which dentist the kid had visited the previous day.
- 64b. The school nurse knew which administrator the kid had visited the previous day.
- 64c. The administrator knew which dentist the kid had visited the previous day.
- 64d. The dentist knew which administrator the kid had visited the previous day.
- 65a. The guide asked which pickpocket the tourist had caught trying to steal.
- 65b. The guide asked which villager the tourist had caught trying to steal.
- 65c. The villager asked which pickpocket the tourist had caught trying to steal.
- 65d. The pickpocket asked which villager the tourist had caught trying to steal.
- 66a. The officer knew which boss the striker had targeted during the riot.
- 66b. The officer knew which activist the striker had targeted during the riot.
- 66c. The activist knew which boss the striker had targeted during the riot.
- 66d. The boss knew which activist the striker had targeted during the riot.
- 67a. The clubber explained which artists the DJ had played at the club.
- 67b. The clubber explained which blogger the DJ had played at the club.
- 67c. The blogger explained which artists the DJ had played at the club.
- 67d. The artists explained which blogger the DJ had played at the club.
- 68a. The classmate guessed which freshman the TA had dated the previous semester.
- 68b. The classmate guessed which lecturer the TA had dated the previous semester.
- 68c. The lecturer guessed which freshman the TA had dated the previous semester.
- 68d. The freshman guessed which lecturer the TA had dated the previous semester.
- 69a. The champion stated which wrestler the referee had disqualified from the match.
- 69b. The champion stated which announcer the referee had disqualified from the match.
- 69c. The announcer stated which wrestler the referee had disqualified from the match.
- 69d. The wrestler stated which announcer the referee had disqualified from the match.
- 70a. The aide stated which prisoner the guard had beaten in the jailhouse.
- 70b. The aide stated which diplomat the guard had beaten in the jailhouse.
- 70c. The diplomat stated which prisoner the guard had beaten in the jailhouse.
- 70d. The prisoner stated which diplomat the guard had beaten in the jailhouse.
- 71a. The executive revealed which customer the manager had helped on the phone.
- 71b. The executive revealed which clerk the manager had helped on the phone.
- 71c. The clerk revealed which customer the manager had helped on the phone.
- 71d. The customer revealed which clerk the manager had helped on the phone.
- 72a. The chief overheard which criminal the police had caught during the bust.
- 72b. The chief overheard which informant the police had caught during the bust.
- 72c. The informant overheard which criminal the police had caught during the bust.
- 72d. The criminal overheard which informant the police had caught during the bust.
- 73a. The employee heard which slacker the boss had fired for being lazy.
- 73b. The employee heard which go-getter the boss had fired for being lazy.
- 73c. The go-getter heard which slacker the boss had fired for being lazy.
- 73d. The slacker heard which go-getter the boss had fired for being lazy.
- 74a. The child observed which biologist the zookeeper had hired for the exhibit.
- 74b. The child observed which tourist the zookeeper had hired for the exhibit.
- 74c. The tourist observed which biologist the zookeeper had hired for the exhibit.
- 74d. The biologist observed which tourist the zookeeper had hired for the exhibit.
- 75a. The CEO guessed which employee the manager had fired for missing work.
- 75b. The CEO guessed which customer the manager had fired for missing work.
- 75c. The customer guessed which employee the manager had fired for missing work.
- 75d. The employee guessed which customer the manager had fired for missing work.
- 76a. The fan surmised which agent the actress had hired for the audition.
- 76b. The fan surmised which admirer the actress had hired for the audition.

76c. The admirer surmised which agent the actress had hired for the audition.  
76d. The agent surmised which admirer the actress had hired for the audition.  
77a. The anchorman reported which candidate the senator had defeated in the last election.  
77b. The anchorman reported which supporter the senator had defeated in the last election.  
77c. The supporter reported which candidate the senator had defeated in the last election.  
77d. The candidate reported which supporter the senator had defeated in the last election.  
78a. The announcer stated which rival the player had defeated during the game.  
78b. The announcer stated which teammate the player had defeated during the game.  
78c. The teammate stated which rival the player had defeated during the game.  
78d. The rival stated which teammate the player had defeated during the game.  
79a. The assistant verified which worker the employer had fired the previous month.  
79b. The assistant verified which applicant the employer had fired the previous month.  
79c. The applicant verified which worker the employer had fired the previous month.  
79d. The worker verified which applicant the employer had fired the previous month.  
80a. The beggar saw which leper the wiseman had cured with his healing.  
80b. The beggar saw which prophet the wiseman had cured with his healing.  
80c. The prophet saw which leper the wiseman had cured with his healing.  
80d. The leper saw which prophet the wiseman had cured with his healing.  
81a. The captain realized which stowaway the sailor had hidden in the cargo area.  
81b. The captain realized which landlubber the sailor had hidden in the cargo area.  
81c. The landlubber realized which stowaway the sailor had hidden in the cargo area.  
81d. The stowaway realized which landlubber the sailor had hidden in the cargo area.  
82a. The circus goers explained which child the clown had scared with his trick.  
82b. The circus goers explained which juggler the clown had scared with his trick.  
82c. The juggler explained which child the clown had scared with his trick.  
82d. The child explained which juggler the clown had scared with his trick.  
83a. The columnist publicized which stylist the supermodel had used for the fashion show.  
83b. The columnist publicized which billionaire the supermodel had used for the fashion show.  
83c. The billionaire publicized which stylist the supermodel had used for the fashion show.  
83d. The stylist publicized which billionaire the supermodel had used for the fashion show.  
84a. The correspondent reported which contestants the judges had chosen for the game show.  
84b. The correspondent reported which spectators the judges had chosen for the game show.  
84c. The spectators reported which contestants the judges had chosen for the game show.  
84d. The contestants reported which spectators the judges had chosen for the game show.  
85a. The editor published which orphan the philanthropist had adopted at a young age.  
85b. The editor published which volunteer the philanthropist had adopted at a young age.  
85c. The volunteer published which orphan the philanthropist had adopted at a young age.  
85d. The orphan published which volunteer the philanthropist had adopted at a young age.  
86a. The football fan heard which cheerleader the quarterback had dated during the semester.  
86b. The football fan heard which linebacker the quarterback had dated during the semester.  
86c. The linebacker heard which cheerleader the quarterback had dated during the semester.  
86d. The cheerleader heard which linebacker the quarterback had dated during the semester.  
87a. The general knew which activist the dictator had imprisoned during the trials.  
87b. The general knew which supporter the dictator had imprisoned during the trials.  
87c. The supporter knew which activist the dictator had imprisoned during the trials.  
87d. The activist knew which supporter the dictator had imprisoned during the trials.  
88a. The historian knew which queen the king had married in the palace.  
88b. The historian knew which prince the king had married in the palace.  
88c. The prince knew which queen the king had married in the palace.  
88d. The queen knew which prince the king had married in the palace.  
89a. The historian recorded which patriot the king had knighted during the ceremony.  
89b. The historian recorded which traitor the king had knighted during the ceremony.  
89c. The traitor recorded which patriot the king had knighted during the ceremony.  
89d. The patriot recorded which traitor the king had knighted during the ceremony.  
90a. The history major learned which mercenaries the emperor had employed to work for him.  
90b. The history major learned which rebels the emperor had employed to work for him.  
90c. The rebel learned which mercenaries the emperor had employed to work for him.  
90d. The mercenaries learned which rebels the emperor had employed to work for him.  
91a. The investigator confirmed which gunman the criminal had hired during the heist.  
91b. The investigator confirmed which cop the criminal had hired during the heist.  
91c. The cop confirmed which gunman the criminal had hired during the heist.  
91d. The gunman confirmed which cop the criminal had hired during the heist.

92a. The manager guessed which client the technician had helped earlier that day.  
 92b. The manager guessed which intern the technician had helped earlier that day.  
 92c. The intern guessed which client the technician had helped earlier that day.  
 92d. The client guessed which intern the technician had helped earlier that day.  
 93a. The monk recalled which sinner the priest had forgiven during the morning mass.  
 93b. The monk recalled which cardinal the priest had forgiven during the morning mass.  
 93c. The cardinal recalled which sinner the priest had forgiven during the morning mass.  
 93d. The sinner recalled which cardinal the priest had forgiven during the morning mass.  
 94a. The movie buff speculated which actor the stuntman had replaced in the movie shot.  
 94b. The movie buff speculated which director the stuntman had replaced in the movie shot.  
 94c. The director speculated which actor the stuntman had replaced in the movie shot.  
 94d. The actor speculated which director the stuntman had replaced in the movie shot.  
 95a. The police woman recognized which lieutenant the officer had promoted to a higher rank.  
 95b. The police woman recognized which thief the officer had promoted to a higher rank.  
 95c. The thief recognized which lieutenant the officer had promoted to a higher rank.  
 95d. The lieutenant recognized which thief the officer had promoted to a higher rank.  
 96a. The politician forgot which voter the senator had bribed to help him win.  
 96b. The politician forgot which intern the senator had bribed to help him win.  
 96c. The intern forgot which voter the senator had bribed to help him win.  
 96d. The voter forgot which intern the senator had bribed to help him win.  
 97a. The priest mentioned which nonbeliever the nun had converted at the church.  
 97b. The priest mentioned which archbishop the nun had converted at the church.  
 97c. The archbishop mentioned which nonbeliever the nun had converted at the church.  
 97d. The nonbeliever mentioned which archbishop the nun had converted at the church.  
 98a. The priestess named which warrior the deity had blessed during the prayer ceremony.  
 98b. The priestess named which infidel the deity had blessed during the prayer ceremony.  
 98c. The infidel named which warrior the deity had blessed during the prayer ceremony.  
 98d. The warrior named which infidel the deity had blessed during the prayer ceremony.  
 99a. The principal forgot which parent the teacher had called to meet with.  
 99b. The principal forgot which student the teacher had called to meet with.  
 99c. The student forgot which parent the teacher had called to meet with.  
 99d. The parent forgot which student the teacher had called to meet with.  
 100a. The reviewer criticized which researchers the authors had cited in their paper.  
 100b. The reviewer criticized which participants the authors had cited in their paper.  
 100c. The participants criticized which researchers the authors had cited in their paper.  
 100d. The researchers criticized which participants the authors had cited in their paper.  
 101a. The Roman asked which god the gladiator had prayed to before the battle.  
 101b. The Roman asked which adversary the gladiator had prayed to before the battle.  
 101c. The adversary asked which god the gladiator had prayed to before the battle.  
 101d. The god asked which adversary the gladiator had prayed to before the battle.  
 102a. The screenwriter clarified which viewers the director had targeted with his movie.  
 102b. The screenwriter clarified which producers the director had targeted with his movie.  
 102c. The producer clarified which viewers the director had targeted with his movie.  
 102d. The viewers clarified which producers the director had targeted with his movie.  
 103a. The scribe recorded which loyalists the monarch had rewarded with a casket of jewels.  
 103b. The scribe recorded which rebels the monarch had rewarded with a casket of jewels.  
 103c. The rebels recorded which loyalists the monarch had rewarded with a casket of jewels.  
 103d. The loyalists recorded which rebels the monarch had rewarded with a casket of jewels.  
 104a. The secretary confirmed which illustrator the author had used for her book.  
 104b. The secretary confirmed which readers the author had used for her book.  
 104c. The reader confirmed which illustrator the author had used for her book.  
 104d. The illustrator confirmed which readers the author had used for her book.  
 105a. The secretary knew which manager the CEO had promoted in his company.  
 105b. The secretary knew which investor the CEO had promoted in his company.  
 105c. The investor knew which manager the CEO had promoted in his company.  
 105d. The manager knew which investor the CEO had promoted in his company.  
 106a. The sentry knew which guard the captain had promoted to a more important position.  
 106b. The sentry knew which townspeople the captain had promoted to a more important position.  
 106c. The townspeople knew which guard the captain had promoted to a more important position.  
 106d. The guard knew which townspeople the captain had promoted to a more important position.  
 107a. The snoop determined which bouncer the alcoholic had hit during a drunken rage.  
 107b. The snoop determined which psychologist the alcoholic had hit during a drunken rage.

107c. The psychologist determined which bouncer the alcoholic had hit during a drunken rage.  
107d. The bouncer determined which psychologist the alcoholic had hit during a drunken rage.  
108a. The spectator remembered which batter the catcher had tagged out during the first half.  
108b. The spectator remembered which pitcher the catcher had tagged out during the first half.  
108c. The pitcher remembered which batter the catcher had tagged out during the first half.  
108d. The batter remembered which pitcher the catcher had tagged out during the first half.  
109a. The stenographer recorded which defendant the judge had sentenced in the trial.  
109b. The stenographer recorded which lawyer the judge had sentenced in the trial.  
109c. The lawyer recorded which defendant the judge had sentenced in the trial.  
109d. The defendant recorded which lawyer the judge had sentenced in the trial.  
110a. The woman indicated which bicyclist the driver had struck with his car.  
110b. The woman indicated which passenger the driver had struck with his car.  
110c. The passenger indicated which bicyclist the driver had struck with his car.  
110d. The bicyclist indicated which passenger the driver had struck with his car.  
111a. The coach learned which fan the referee had yelled at during the time-out.  
111b. The coach learned which footballer the referee had yelled at during the time-out.  
111c. The footballer learned which fan the referee had yelled at during the time-out.  
111d. The fan learned which footballer the referee had yelled at during the time-out.  
112a. The mother stated which pediatrician the nurse had recommended to regularly see.  
112b. The mother stated which child the nurse had recommended to regularly see.  
112c. The child stated which pediatrician the nurse had recommended to regularly see.  
112d. The pediatrician stated which child the nurse had recommended to regularly see.  
113a. The administrator recognized which pupil the tutor had taught math weekly to.  
113b. The administrator recognized which advisor the tutor had taught math weekly to.  
113c. The advisor recognized which pupil the tutor had taught math weekly to.  
113d. The pupil recognized which advisor the tutor had taught math weekly to.  
114a. The fashion designer guessed which techie the photographer had hired for the shoot.  
114b. The fashion designer guessed which model the photographer had hired for the shoot.  
114c. The model guessed which techie the photographer had hired for the shoot.  
114d. The techie guessed which model the photographer had hired for the shoot.  
115a. The deputy deduced which hooligan the guard had detained during the fight.  
115b. The deputy deduced which victim the guard had detained during the fight.  
115c. The victim deduced which hooligan the guard had detained during the fight.  
115d. The hooligan deduced which victim the guard had detained during the fight.  
116a. The journalist reported which politician the activist had supported during the elections.  
116b. The journalist reported which voter the activist had supported during the elections.  
116c. The voter reported which politician the activist had supported during the elections.  
116d. The politician reported which voter the activist had supported during the elections.  
117a. The street vendor saw which panhandler the shopkeeper had caught trying to steal.  
117b. The street vendor saw which pedestrian the shopkeeper had caught trying to steal.  
117c. The pedestrian saw which panhandler the shopkeeper had caught trying to steal.  
117d. The panhandler saw which pedestrian the shopkeeper had caught trying to steal.  
118a. The journalist knew which firefighter the mayor had awarded a medal to.  
118b. The journalist knew which arsonist the mayor had awarded a medal to.  
118c. The arsonist knew which firefighter the mayor had awarded a medal to.  
118d. The firefighter knew which arsonist the mayor had awarded a medal to.  
119a. The assistant knew which engineer the boss had promoted earlier that week.  
119b. The assistant knew which client the boss had promoted earlier that week.  
119c. The client knew which engineer the boss had promoted earlier that week.  
119d. The engineer knew which client the boss had promoted earlier that week.  
120a. The movie buff learned which actor the director had cast for the role.  
120b. The movie buff learned which producer the director had cast for the role.  
120c. The producer learned which actor the director had cast for the role.  
120d. The actor learned which producer the director had cast for the role.
